# Supplementary material
Source: PubMed Central journal article supplement (PMC7988526)
Supplement: mcaa036_suppl_supplementary_table_s01.pdf [file mcaa036_suppl_supplementary_table_s01.pdf]

**Supplementary Table 1** – GPS coordinate information for all accessions used in this study.

| Species                  | Genotype ID | Longitude | Latitude | State          |
|--------------------------|-------------|-----------|----------|----------------|
| <i>Yucca aloifolia</i>   | 3           | -75.6369  | 35.95752 | North Carolina |
| <i>Yucca aloifolia</i>   | 6           | -78.9285  | 33.64912 | South Carolina |
| <i>Yucca aloifolia</i>   | 7           | -78.9256  | 33.6501  | South Carolina |
| <i>Yucca aloifolia</i>   | 13          | -80.2931  | 32.50592 | South Carolina |
| <i>Yucca aloifolia</i>   | 23          | -83.3791  | 33.92746 | Georgia        |
| <i>Yucca aloifolia</i>   | 24          | -83.4092  | 33.94787 | Georgia        |
| <i>Yucca filamentosa</i> | 1           | -75.6384  | 35.95847 | Georgia        |
| <i>Yucca filamentosa</i> | 2           | -75.6381  | 35.95818 | Georgia        |
| <i>Yucca filamentosa</i> | 4           | -75.6339  | 35.96482 | Georgia        |
| <i>Yucca filamentosa</i> | 9           | -79.0623  | 33.5044  | South Carolina |
| <i>Yucca filamentosa</i> | 22          | -83.3425  | 33.90708 | North Carolina |
| <i>Yucca filamentosa</i> | 27          | -83.3903  | 33.92129 | North Carolina |
| <i>Yucca filamentosa</i> | 30          | -83.333   | 33.93201 | North Carolina |
| <i>Yucca gloriosa</i>    | 12          | -79.0645  | 33.50278 | South Carolina |
| <i>Yucca gloriosa</i>    | 14          | -80.2955  | 32.50398 | South Carolina |
| <i>Yucca gloriosa</i>    | 15          | -80.2957  | 32.50393 | South Carolina |
| <i>Yucca gloriosa</i>    | 16          | -80.4303  | 32.39087 | South Carolina |
| <i>Yucca gloriosa</i>    | 17          | -80.4303  | 32.39087 | South Carolina |
| <i>Yucca gloriosa</i>    | 18          | -81.4082  | 31.11907 | Georgia        |
| <i>Yucca gloriosa</i>    | 19          | -81.4348  | 31.02172 | Georgia        |
| <i>Yucca gloriosa</i>    | 20          | -81.3661  | 31.14895 | Georgia        |
| <i>Yucca gloriosa</i>    | 36          | -76.6855  | 34.69532 | North Carolina |
| <i>Yucca gloriosa</i>    | 37          | -76.6776  | 34.69557 | North Carolina |
| <i>Yucca gloriosa</i>    | 43          | -81.4116  | 30.46377 | Florida        |
| <i>Yucca gloriosa</i>    | 45          | -81.4103  | 30.42898 | Florida        |
| <i>Yucca gloriosa</i>    | 46          | -81.4136  | 30.43875 | Florida        |
| <i>Yucca gloriosa</i>    | 48          | -81.4544  | 30.50788 | Florida        |
| <i>Yucca gloriosa</i>    | 51          | -81.445   | 30.52185 | Florida        |
| <i>Yucca gloriosa</i>    | 52          | -81.445   | 30.52185 | Florida        |
| <i>Yucca gloriosa</i>    | 53          | -81.438   | 30.70468 | Florida        |
| <i>Yucca gloriosa</i>    | 55          | -75.559   | 35.83297 | North Carolina |
| <i>Yucca gloriosa</i>    | 56          | -75.4261  | 35.53222 | North Carolina |
| <i>Yucca gloriosa</i>    | 61          | -75.4832  | 35.4698  | North Carolina |
| <i>Yucca gloriosa</i>    | 70          | -78.5422  | 33.85128 | North Carolina |
| <i>Yucca gloriosa</i>    | 1AB         | -81.3656  | 31.1507  | Georgia        |
| <i>Yucca gloriosa</i>    | 2AB         | -81.3656  | 31.1507  | Georgia        |
| <i>Yucca gloriosa</i>    | G           | -81.4282  | 30.8464  | Georgia        |
| <i>Yucca gloriosa</i>    | Eudy        | -81.4282  | 30.8464  | Georgia        |
