# Supplementary material
Source: PubMed Central journal article supplement (PMC7988526)
Supplement: mcaa036_suppl_supplementary_table_s02.pdf [file mcaa036_suppl_supplementary_table_s02.pdf]

**Supplementary Table 2** – Soil dry down information for *Yucca gloriosa* genotypes measured for gas exchange and titratable acidity.

| Individual   | Genotype | Experimental Date | %soil Day1 | %soil Day7 | %soil Day9 |
|--------------|----------|-------------------|------------|------------|------------|
| 1AB.2.1.2013 | 1AB      | 16-Apr            | 6.4        | 1.3        | 3.6        |
| 18.2.3.2015  | 18       | 16-Apr            | 14.9       | 4.3        | 7.3        |
| 2AB.1.2.2013 | 2AB      | 16-Apr            | 8.6        | 2.6        | 4.5        |
| 1AB.1.1.2013 | 1AB      | 16-Apr            | 12.6       | 1.6        | 15.7       |
| 1AB.2.0.2012 | 1AB      | 16-Apr            | 5.5        | NA         | NA         |
| 18.2.4.2015  | 18       | 16-Apr            | 9.4        | 4.3        | 21.2       |
| 1AB.1.1.2015 | 1AB      | 16-Apr            | 10.5       | 5.2        | 10.2       |
| 2AB.2.1.2013 | 2AB      | 16-Apr            | 9.5        | 2.5        | 8.3        |
| 2D           | 2AB      | 16-Apr            | 9.5        | 3.8        | 16.4       |
| 2AB.1.1.2013 | 2AB      | 16-Apr            | 10.3       | 3.4        | 5.1        |
| 18.1.1.2015  | 18       | 16-Apr            | 12.4       | 3.1        | 16.4       |
| 18.2.1.2015  | 18       | 16-Apr            | 11.5       | 6          | 15.5       |
| G.0.1.2015   | G        | 16-Sep            | 22.8       | 7.1        | 18.6       |
| 19.2.2.2015  | 19       | 16-Sep            | 12.4       | 1.5        | 14.5       |
| 12.1.3.2016  | 12       | 16-Sep            | 16.8       | 5.4        | 15.5       |
| 45.1.0.2015  | 45       | 16-Sep            | 5.7        | 3.1        | 10.6       |
| 13.2.1.201X  | 13       | 16-Sep            | 16.9       | 1          | 18.4       |
| G.0.3.2015   | G        | 16-Sep            | 19         | 7          | 20.7       |
| 45.2.3.2015  | 45       | 16-Sep            | 10.2       | 2.1        | 15.1       |
| 19.2.3.2015  | 19       | 16-Sep            | 11.5       | 1.4        | 12.2       |
| 19.1.1.201X  | 19       | 16-Sep            | 8.1        | 1          | 15.9       |
| 45.2.0.2015  | 45       | 16-Sep            | 9.1        | 2.2        | 10.9       |
| G.0.0.2013   | G        | 16-Sep            | 18.1       | 3.7        | 20.4       |
| 19.2.1.201X  | 19       | 16-Sep            | 8.8        | 1          | 15.7       |
| 13.1.2.2016  | 13       | 16-Sep            | 15.5       | 1.5        | 12.1       |
| 13.1.4.2016  | 13       | 16-Sep            | 18.1       | 3.6        | 18.3       |
| 45.1.1.2015  | 45       | 16-Sep            | 9.1        | 2.2        | 11         |
| G.0.2.2015   | G        | 16-Sep            | 21         | 5.7        | 21.4       |
| 46.1.0       | 46       | 16-Nov            | 17.8       | 3.8        | 21.1       |
| Eudy3        | Eudy     | 16-Nov            | 10.1       | 0          | 9.72       |
| 15.2.1.201X  | 15       | 16-Nov            | 11.5       | 0.8        | 15.6       |
| 15.1.1.201X  | 15       | 16-Nov            | 33.4       | 3.1        | 38         |
| Eudy1        | Eudy     | 16-Nov            | 26.7       | 5.3        | 24.4       |
| 15.2.2.201X  | 15       | 16-Nov            | 15.1       | 0          | 17.1       |
| 46.1.2.2015  | 46       | 16-Nov            | 22.8       | 2.1        | 30.1       |
| 20.2.4.2015  | 20       | 16-Nov            | 22.9       | 3          | 27.1       |
| Eudy4        | Eudy     | 16-Nov            | 28.6       | 0.7        | 26.2       |
| 20.2.5.2015  | 20       | 16-Nov            | 39.2       | 6.5        | 35.8       |
| 20.2.3.2015  | 20       | 16-Nov            | 29.7       | 3.7        | 41.1       |

|               |      |            |      |     |      |
|---------------|------|------------|------|-----|------|
| Eudy2         | Eudy | 16-Nov     | 23.6 | 3.1 | 32   |
| 20.2.1.2015   | 20   | 16-Nov     | 21.5 | 1.7 | 29.4 |
| 46.1.1.2015   | 46   | 16-Nov     | 12.4 | 4.6 | 15.6 |
| 43.2.3.2015   | 43   | 17-Feb     | 8.6  | 1   | 5.5  |
| 43.1.1.2015   | 43   | 17-Feb     | 8.6  | 0   | 12.5 |
| 43.2.4.2015   | 43   | 17-Feb     | 12.5 | 2.3 | 1.2  |
| 43.2.1.2015   | 43   | 17-Feb     | 13.1 | 2.7 | 6.7  |
| 53.2.2.2015   | 53   | April-17-1 | 7.8  | 0.9 | 7.3  |
| 36.1.2.2016   | 36   | April-17-1 | 14.3 | 2.5 | 8.7  |
| 48.2.3.2015   | 48   | April-17-1 | 11.6 | 1.2 | 11.5 |
| 36.1.1.2016   | 36   | April-17-1 | 10.9 | 2.8 | 8.7  |
| 48.1.1.2015   | 48   | April-17-1 | 4.8  | 0.8 | 2.2  |
| 37.X.6.2015   | 37   | April-17-1 | 9.1  | 3.8 | 7.7  |
| 36.1.5.2016   | 36   | April-17-1 | 15.2 | 2.5 | 12.9 |
| 36.1.6.2016   | 36   | April-17-1 | 11.4 | 3.8 | 11.5 |
| 53.2.5.2015   | 53   | April-17-1 | 14.3 | 1.9 | 9.2  |
| 53.2.1.2015   | 53   | April-17-1 | 11.6 | 0.5 | 4.1  |
| 37.X.1.2015   | 37   | April-17-1 | 15.3 | 4.5 | 7.7  |
| 48.2.0.2014   | 48   | April-17-1 | 13.7 | 1.7 | 3.8  |
| 37.X.7.2015   | 37   | April-17-1 | 8.7  | 0.4 | 7.6  |
| 53.2.3.2015   | 53   | April-17-1 | 7.6  | 2.6 | 3.1  |
| 37.X.8.2015   | 37   | April-17-1 | 18.4 | 3.2 | 7.3  |
| 48.2.1.2015   | 48   | April-17-1 | 18.9 | 2.3 | 6.9  |
| 16.X.7.2016   | 16   | April-17-2 | 10.1 | 2.3 | 5    |
| 16.X.6.2016   | 16   | April-17-2 | 7.2  | 0.9 | 3    |
| 56.1.2.2016   | 56   | April-17-2 | 11.3 | 4.3 | 8.5  |
| 12.2.1.2015   | 12   | April-17-2 | 15.2 | 6.3 | 11.4 |
| 12.2.1.2015.2 | 12   | April-17-2 | 12.9 | 2.3 | 7.9  |
| 56.2.1.2016   | 56   | April-17-2 | 14.8 | 5.4 | 18.4 |
| 52.1.2.2015   | 52   | April-17-2 | 14.9 | 3.8 | 9.9  |
| 12.2.3.2015   | 12   | April-17-2 | 17.1 | 6.1 | 8    |
| 56.2.0.2015   | 56   | April-17-2 | 19.2 | 3.2 | 7    |
| 52.1.3.2015   | 52   | April-17-2 | 11.8 | 1.8 | 10   |
| 52.1.0.2014   | 52   | April-17-2 | 9.9  | 3.3 | 5.6  |
| 16.X.1.2016   | 16   | April-17-2 | 10   | 3.7 | 2    |
| 56.1.0.2015   | 56   | April-17-2 | 15.2 | 1.1 | 6.7  |
| 16.X.2.2016   | 16   | April-17-2 | 17.1 | 3.5 | 8.9  |
| 12.1.5.2016   | 12   | April-17-2 | 12.9 | 1.7 | 9.3  |
| 61.1.3.2016   | 61   | 17-Aug     | 10.1 | 3.1 | 6.7  |
| 61.2.0.2015   | 61   | 17-Aug     | 7.3  | 4.1 | 11.5 |
| 70.1.2.2016   | 70   | 17-Aug     | 9.5  | 6.4 | 6.5  |
| 55.2.0.2015   | 55   | 17-Aug     | 11.3 | 1.4 | 8.6  |
| 70.1.3.2016   | 70   | 17-Aug     | 15.6 | 3   | 7.9  |

|             |    |        |      |     |      |
|-------------|----|--------|------|-----|------|
| 70.1.0.2015 | 70 | 17-Aug | 21   | 6.2 | 12.7 |
| 51.1.2.2015 | 51 | 17-Aug | 10.9 | 0.5 | 5.7  |
| 51.1.3.2015 | 51 | 17-Aug | 14.5 | 3   |      |
| 61.2.2.2016 | 61 | 17-Aug | 18.6 | 5.4 | 11.6 |
| 55.2.1.2016 | 55 | 17-Aug | 17   | 5   | 8.2  |
| 55.2.2.2016 | 55 | 17-Aug | 9.8  | 1.9 | 9.5  |
| 51.2.2.2015 | 51 | 17-Aug | 9.2  | 1.6 | 8.7  |
| 51.1.0.2014 | 51 | 17-Aug | 4.3  | 2.6 | 4.1  |
