# Supplementary material
Source: PubMed Central journal article supplement (PMC7988526)
Supplement: mcaa036_suppl_supplementary_table_s03.pdf [file mcaa036_suppl_supplementary_table_s03.pdf]

**Supplementary Table 3** – ANOVA of within *Yucca gloriosa* trait differences across genotypes, and an ANCOVA of trait differences in genotype ~ treatment.

| <b>ANOVA of within-Y. gloriosa trait differences across genotypes</b> |           |               |                |                |          |
|-----------------------------------------------------------------------|-----------|---------------|----------------|----------------|----------|
|                                                                       | <b>Df</b> | <b>Sum sq</b> | <b>Mean Sq</b> | <b>F value</b> | <b>p</b> |
| Leaf thickness                                                        | 25        | 3.93E+05      | 1.57E+04       | 1.663529       | 0.11577  |
| residual                                                              | 22        | 2.08E+05      | 9.46E+03       |                |          |
| IAS                                                                   | 25        | 8.77E-02      | 3.51E-03       | 3.363057       | 0.00317  |
| residual                                                              | 21        | 2.19E-02      | 1.04E-03       |                |          |
| maxTA                                                                 | 23        | 7.10E+05      | 3.09E+04       | 2.60951        | 0.00145  |
| residual                                                              | 62        | 7.34E+05      | 1.18E+04       |                |          |
| mean cell                                                             | 25        | 2.01E+06      | 8.02E+04       | 2.00461        | 0.05179  |
| residual                                                              | 22        | 8.80E+05      | 4.00E+04       |                |          |
| mean stomata                                                          | 24        | 1.01E+04      | 4.19E+02       | 3.737353       | 0.00831  |
| residual                                                              | 13        | 1.46E+03      | 1.12E+02       |                |          |

| <b>ANCOVA of within Y. gloriosa trait differences between genotypes and treatments</b> |                      |           |               |                |                |          |     |
|----------------------------------------------------------------------------------------|----------------------|-----------|---------------|----------------|----------------|----------|-----|
|                                                                                        |                      | <b>Df</b> | <b>Sum sq</b> | <b>Mean Sq</b> | <b>F value</b> | <b>p</b> |     |
| AUC                                                                                    | genotype             | 21        | 3087.7        | 147            | 2.3369         | 0.001964 | **  |
|                                                                                        | treatment            | 2         | 10640.4       | 10640.4        | 169.1194       | 0        | *** |
|                                                                                        | genotype * treatment | 21        | 793.1         | 37.8           | 0.6003         | 0.912421 |     |
|                                                                                        | residuals            | 131       | 8242          | 62.9           |                |          |     |
| AUC_night                                                                              | genotype             | 21        | 32.392        | 1.54246        | 2.4592         | 0.001075 | **  |
|                                                                                        | treatment            | 1         | 0.561         | 0.56081        | 0.8941         | 0.346105 |     |
|                                                                                        | genotype * treatment | 21        | 31.117        | 1.48176        | 2.3624         | 0.001733 | **  |
|                                                                                        | residuals            | 131       | 82.166        | 0.62722        |                |          |     |
| deltaH+                                                                                | genotype             | 23        | 443475        | 19281.5        | 4.7781         | 6.15E-09 | *** |
|                                                                                        | treatment            | 1         | 20161         | 20161.4        | 4.9962         | 0.02725  | *   |
|                                                                                        | genotype * treatment | 23        | 346373        | 15059.7        | 3.7319         | 1.19E-06 | *** |
|                                                                                        | residuals            | 120       | 484245        | 4035.4         |                |          |     |

**Abbreviations:**

|              |                                                   |
|--------------|---------------------------------------------------|
| AUC          | Area under the curve, LiCor data                  |
| AUC_night    | Area under the curve, LiCor data, night only      |
| deltaH+      | Leaf acid accumulation                            |
| maxTA        | Maximum amount of acid accumulated (well-watered) |
| IAS          | Intercellular airspace                            |
| mean cell    | Mean cell area (um)                               |
| mean stomata | Mean stomatal density                             |
