# Supplementary material
Source: PubMed Central journal article supplement (PMC7988526)
Supplement: mcaa036_suppl_supplementary_table_s04.pdf [file mcaa036_suppl_supplementary_table_s04.pdf]

**Supplementary Table 4** – ANOVA of trait differences between the three species, *Y. aloifolia*, *Y. filamentosa*, and the hybrid *Y. gloriosa*.

| ANOVA of trait differences between species |     |          |          |          |          |            |
|--------------------------------------------|-----|----------|----------|----------|----------|------------|
|                                            | Df  | Sum S    | Mean Sq  | F value  | Pr(>F)   | adjusted P |
| Leaf thickness                             | 2   | 3.14E+06 | 1.57E+06 | 100.3775 | 9.62E-21 | 4.81E-20   |
| residual                                   | 66  | 1.03E+06 | 1.57E+04 |          |          |            |
| IAS                                        | 2   | 2.21E-01 | 1.11E-01 | 47.19602 | 2.19E-13 | 4.68E-13   |
| residual                                   | 65  | 1.52E-01 | 2.34E-03 |          |          |            |
| Adaxial cell area                          | 2   | 1.19E+07 | 5.95E+06 | 68.74183 | 7.30E-17 | 2.19E-16   |
| residual                                   | 66  | 5.71E+06 | 8.65E+04 |          |          |            |
| Abaxial cell area                          | 2   | 1.08E+07 | 5.42E+06 | 59.04744 | 1.99E-15 | 4.97E-15   |
| residual                                   | 66  | 6.06E+06 | 9.18E+04 |          |          |            |
| AUC_W                                      | 2   | 1.89E+03 | 9.44E+02 | 10.63758 | 5.85E-05 | 9.75E-05   |
| residual                                   | 113 | 1.00E+04 | 8.88E+01 |          |          |            |
| AUC_D                                      | 2   | 5.93E+02 | 2.97E+02 | 5.179283 | 7.27E-03 | 7.79E-03   |
| residual                                   | 98  | 5.61E+03 | 5.73E+01 |          |          |            |
| AUC_W_night                                | 2   | 4.28E+02 | 2.14E+02 | 234.2304 | 6.36E-41 | 9.54E-40   |
| residual                                   | 113 | 1.03E+02 | 9.14E-01 |          |          |            |
| AUC_D_night                                | 2   | 1.89E+02 | 9.44E+01 | 81.51904 | 1.69E-21 | 1.27E-20   |
| residual                                   | 97  | 1.12E+02 | 1.16E+00 |          |          |            |
| d1 delta                                   | 2   | 1.18E+05 | 5.90E+04 | 7.342508 | 1.09E-03 | 1.26E-03   |
| residual                                   | 93  | 7.47E+05 | 8.04E+03 |          |          |            |
| d7 delta                                   | 2   | 2.30E+05 | 1.15E+05 | 17.26884 | 4.19E-07 | 7.86E-07   |
| residual                                   | 93  | 6.20E+05 | 6.67E+03 |          |          |            |
| maxTA                                      | 2   | 2.40E+05 | 1.20E+05 | 7.443693 | 9.93E-04 | 1.24E-03   |
| residual                                   | 95  | 1.53E+06 | 1.61E+04 |          |          |            |
| adaxial SD                                 | 2   | 1.17E+04 | 5.85E+03 | 9.727192 | 3.00E-04 | 4.09E-04   |
| residual                                   | 46  | 2.76E+04 | 6.01E+02 |          |          |            |
| abaxial SD                                 | 2   | 4.16E+03 | 2.08E+03 | 3.174765 | 5.13E-02 | 5.13E-02   |
| residual                                   | 45  | 2.95E+04 | 6.55E+02 |          |          |            |
| AUC_RW                                     | 2   | 1.48E+03 | 7.40E+02 | 9.132095 | 2.25E-04 | 3.37E-04   |
| residual                                   | 102 | 8.26E+03 | 8.10E+01 |          |          |            |
| AUC_RW_night                               | 2   | 1.21E+02 | 6.07E+01 | 65.84812 | 3.80E-19 | 1.43E-18   |
| residual                                   | 103 | 9.49E+01 | 9.21E-01 |          |          |            |

**Abbreviations:**

|             |                                                               |
|-------------|---------------------------------------------------------------|
| AUC_W       | Area under the curve, LiCor data well-watered                 |
| AUC_D       | Area under the curve, LiCor data drought-stressed             |
| AUC_W_night | Area under the curve, LiCor data well-watered, night only     |
| AUC_D_night | Area under the curve, LiCor data drought-stressed, night only |
| AUC_RW      | Area under the curve, LiCor data re-watered                   |

|              |                                                         |
|--------------|---------------------------------------------------------|
| AUC_RW_night | Area under the curve, LiCor data re-watered, night only |
| d1delta      | Leaf acid accumulation, well-watered                    |
| d7delta      | Leaf acid accumulation, drought-stressed                |
| maxTA        | Maximum amount of acid accumulated (well-watered)       |
| abaxial SD   | Mean stomatal density on abaxial side of the leaf       |
| adaxial SD   | Mean stomatal density on adaxial side of the leaf       |
