# Supplementary material
Source: PubMed Central journal article supplement (PMC7988526)
Supplement: mcaa036_suppl_supplementary_table_s05.pdf [file mcaa036_suppl_supplementary_table_s05.pdf]

**Supplementary Table 5** – Correlations across all three species of *Yucca*, on both raw data (individual plants) and genotypic means.

| Correlations on raw data |             |          |          |    |          |          |          |
|--------------------------|-------------|----------|----------|----|----------|----------|----------|
| x                        | y           | cor      | R2       | df | t.value  | p.value  | padj     |
| AUC_D                    | AUC_W       | 0.57374  | 0.329178 | 99 | 6.969946 | 3.57E-10 | 4.64E-09 |
| AUC_D_night              | AUC_W       | 0.312798 | 0.097842 | 98 | 3.260134 | 0.001532 | 0.004979 |
| AUC_D_night              | AUC_W_night | 0.76847  | 0.590546 | 98 | 11.88877 | 1.03E-20 | 2.69E-19 |
| AUC_D_night              | d1delta     | 0.38312  | 0.146781 | 75 | 3.591994 | 0.000584 | 0.002168 |
| AUC_D_night              | d7delta     | 0.53239  | 0.283439 | 75 | 5.446711 | 6.24E-07 | 4.64E-06 |
| AUC_D_night              | maxTA_d1    | 0.447479 | 0.200237 | 77 | 4.390737 | 3.55E-05 | 0.000205 |
| AUC_D_night              | meancell    | 0.604357 | 0.365248 | 34 | 4.423146 | 9.48E-05 | 0.000411 |
| AUC_D_night              | thickum     | 0.622444 | 0.387437 | 34 | 4.637292 | 5.05E-05 | 0.000262 |
| AUC_W_night              | AUC_D       | 0.249919 | 0.06246  | 99 | 2.568161 | 0.011718 | 0.027697 |
| AUC_W_night              | d1delta     | 0.299694 | 0.089817 | 77 | 2.75651  | 0.007291 | 0.018956 |
| AUC_W_night              | d7delta     | 0.449911 | 0.20242  | 77 | 4.420635 | 3.18E-05 | 0.000205 |
| AUC_W_night              | maxTA_d1    | 0.384125 | 0.147552 | 79 | 3.697877 | 0.0004   | 0.001599 |
| AUC_W_night              | meancell    | 0.712575 | 0.507763 | 47 | 6.962932 | 9.30E-09 | 8.06E-08 |
| AUC_W_night              | thickum     | 0.744887 | 0.554857 | 47 | 7.654015 | 8.40E-10 | 8.74E-09 |
| d1delta                  | d7delta     | 0.299087 | 0.089453 | 93 | 3.022645 | 0.003237 | 0.009352 |
| d7delta                  | AUC_D       | 0.371735 | 0.138187 | 74 | 3.444633 | 0.000945 | 0.003277 |
| IAS                      | AUC_D       | -0.44819 | 0.20087  | 33 | -2.88009 | 0.006932 | 0.018956 |
| IAS                      | AUC_D_night | -0.43409 | 0.188435 | 33 | -2.76807 | 0.009176 | 0.02272  |
| IAS                      | AUC_W       | -0.53486 | 0.286075 | 46 | -4.29332 | 8.99E-05 | 0.000411 |
| IAS                      | AUC_W_night | -0.43782 | 0.191684 | 46 | -3.3028  | 0.001858 | 0.005683 |
| maxTA_d1                 | d7delta     | 0.617682 | 0.381531 | 94 | 7.615005 | 2.03E-11 | 3.53E-10 |
| meancell                 | thickum     | 0.889419 | 0.791066 | 67 | 15.92717 | 1.81E-24 | 9.39E-23 |
| meanSD                   | AUC_W_night | -0.44168 | 0.195084 | 26 | -2.51028 | 0.018619 | 0.042095 |
| AUC_D                    | maxTA_d1    | 0.245118 | 0.060083 | 76 | 2.204131 | 0.030542 | 0.066175 |
| IAS                      | thickum     | -0.24707 | 0.061042 | 65 | -2.05564 | 0.043839 | 0.091184 |
| meancell                 | AUC_W       | -0.26119 | 0.068222 | 47 | -1.85505 | 0.069867 | 0.139734 |
| meancell                 | meanSD      | -0.3517  | 0.123696 | 22 | -1.76222 | 0.091922 | 0.177035 |
| thickum                  | meanSD      | -0.32511 | 0.105699 | 22 | -1.61252 | 0.121103 | 0.224905 |
| IAS                      | meancell    | -0.17389 | 0.030239 | 65 | -1.42365 | 0.159329 | 0.251064 |
| IAS                      | meanSD      | 0.297944 | 0.088771 | 22 | 1.463972 | 0.157345 | 0.251064 |
| IAS                      | d1delta     | -0.28296 | 0.080067 | 26 | -1.50431 | 0.144554 | 0.251064 |
| thickum                  | AUC_W       | -0.20525 | 0.042126 | 47 | -1.4377  | 0.157143 | 0.251064 |
| thickum                  | maxTA_d1    | 0.278607 | 0.077622 | 26 | 1.479192 | 0.151104 | 0.251064 |
| IAS                      | maxTA_d1    | -0.26259 | 0.068952 | 26 | -1.38763 | 0.177028 | 0.270749 |
| meanSD                   | d1delta     | -0.29026 | 0.08425  | 18 | -1.28686 | 0.214446 | 0.318605 |
| thickum                  | d1delta     | 0.216917 | 0.047053 | 26 | 1.133042 | 0.267537 | 0.386443 |
| IAS                      | d7delta     | -0.21713 | 0.047147 | 25 | -1.11221 | 0.27663  | 0.388777 |
| AUC_W                    | d7delta     | 0.117406 | 0.013784 | 77 | 1.037405 | 0.302794 | 0.41435  |

|          |             |          |          |    |          |          |          |
|----------|-------------|----------|----------|----|----------|----------|----------|
| meancell | d7delta     | -0.17515 | 0.030676 | 25 | -0.88948 | 0.382225 | 0.509634 |
| meanSD   | AUC_D_night | -0.18131 | 0.032873 | 16 | -0.73746 | 0.471519 | 0.612974 |
| meanSD   | AUC_D       | 0.158881 | 0.025243 | 17 | 0.663509 | 0.515902 | 0.638736 |
| AUC_W    | d1delta     | -0.07481 | 0.005597 | 77 | -0.65832 | 0.512299 | 0.638736 |
| meancell | d1delta     | 0.110505 | 0.012211 | 26 | 0.566938 | 0.575618 | 0.696097 |
| AUC_W    | meanSD      | -0.10572 | 0.011176 | 26 | -0.54209 | 0.592376 | 0.70008  |
| thickum  | d7delta     | 0.081677 | 0.006671 | 25 | 0.409752 | 0.685478 | 0.763994 |
| meancell | maxTA_d1    | -0.07871 | 0.006196 | 26 | -0.4026  | 0.690533 | 0.763994 |
| AUC_D    | d1delta     | 0.050302 | 0.00253  | 74 | 0.433262 | 0.666085 | 0.763994 |
| AUC_W    | maxTA_d1    | 0.038753 | 0.001502 | 79 | 0.344701 | 0.731235 | 0.792172 |
| meancell | AUC_D       | -0.05547 | 0.003076 | 34 | -0.32392 | 0.747984 | 0.793778 |
| meanSD   | d7delta     | -0.05516 | 0.003043 | 18 | -0.23439 | 0.817329 | 0.850022 |
| thickum  | AUC_D       | 0.02835  | 0.000804 | 34 | 0.165372 | 0.86963  | 0.886682 |
| meanSD   | maxTA_d1    | 0.009394 | 8.82E-05 | 18 | 0.039858 | 0.968645 | 0.968645 |

### Correlations on genotypic means

| x           | y           | cor      | R2       | df | t.value  | p.value  | padj     |
|-------------|-------------|----------|----------|----|----------|----------|----------|
| AUC_D       | AUC_W       | 0.737386 | 0.543738 | 29 | 5.878774 | 2.22E-06 | 1.93E-05 |
| AUC_D       | maxTA_d1    | 0.525983 | 0.276658 | 24 | 3.029738 | 0.005782 | 0.017685 |
| AUC_D_night | AUC_W_night | 0.819337 | 0.671313 | 29 | 7.696097 | 1.74E-08 | 4.52E-07 |
| AUC_D_night | d1delta     | 0.616404 | 0.379954 | 24 | 3.834945 | 0.000799 | 0.003195 |
| AUC_D_night | d7delta     | 0.722282 | 0.521692 | 24 | 5.116333 | 3.10E-05 | 0.000201 |
| AUC_D_night | maxTA_d1    | 0.638753 | 0.408005 | 24 | 4.067049 | 0.000445 | 0.001927 |
| AUC_D_night | meancell    | 0.712399 | 0.507512 | 24 | 4.97314  | 4.45E-05 | 0.000257 |
| AUC_D_night | thickum     | 0.724402 | 0.524758 | 24 | 5.147876 | 2.86E-05 | 0.000201 |
| AUC_W_night | AUC_D       | 0.414227 | 0.171584 | 29 | 2.45083  | 0.02052  | 0.048501 |
| AUC_W_night | d1delta     | 0.517514 | 0.26782  | 24 | 2.962911 | 0.006776 | 0.019576 |
| AUC_W_night | d7delta     | 0.646963 | 0.418562 | 24 | 4.156554 | 0.000354 | 0.001676 |
| AUC_W_night | maxTA_d1    | 0.579308 | 0.335598 | 24 | 3.481767 | 0.001927 | 0.006681 |
| AUC_W_night | meancell    | 0.822761 | 0.676936 | 25 | 7.237677 | 1.39E-07 | 2.40E-06 |
| AUC_W_night | thickum     | 0.802729 | 0.644374 | 25 | 6.730427 | 4.71E-07 | 6.12E-06 |
| d1delta     | d7delta     | 0.517048 | 0.267338 | 28 | 3.196377 | 0.003436 | 0.011169 |
| d7delta     | AUC_D       | 0.656099 | 0.430466 | 24 | 4.259071 | 0.000273 | 0.001421 |
| IAS         | AUC_D       | -0.50662 | 0.25666  | 24 | -2.87866 | 0.008264 | 0.022617 |
| IAS         | AUC_D_night | -0.48779 | 0.237938 | 24 | -2.73743 | 0.011476 | 0.029837 |
| IAS         | AUC_W       | -0.59668 | 0.356028 | 25 | -3.71773 | 0.001019 | 0.003785 |
| IAS         | AUC_W_night | -0.47222 | 0.222996 | 25 | -2.67859 | 0.01288  | 0.031894 |
| maxTA_d1    | d7delta     | 0.765006 | 0.585234 | 28 | 6.285538 | 8.52E-07 | 8.86E-06 |
| meancell    | thickum     | 0.93797  | 0.879787 | 35 | 16.00468 | 1.13E-17 | 5.86E-16 |
| AUC_D_night | AUC_W       | 0.397453 | 0.157969 | 29 | 2.332495 | 0.026822 | 0.05914  |
| meanSD      | AUC_W_night | -0.44112 | 0.194583 | 23 | -2.35725 | 0.027295 | 0.05914  |
| AUC_D       | d1delta     | 0.408719 | 0.167051 | 24 | 2.193924 | 0.038162 | 0.079378 |
| meancell    | AUC_W       | -0.3267  | 0.106732 | 25 | -1.72833 | 0.096264 | 0.192527 |

|                 |             |          |          |    |          |          |          |
|-----------------|-------------|----------|----------|----|----------|----------|----------|
| <b>meancell</b> | meanSD      | -0.34722 | 0.120561 | 20 | -1.65583 | 0.113364 | 0.21833  |
| <b>IAS</b>      | thickum     | -0.25099 | 0.062997 | 35 | -1.53399 | 0.134023 | 0.240317 |
| <b>thickum</b>  | meanSD      | -0.33252 | 0.110569 | 20 | -1.5768  | 0.130529 | 0.240317 |
| <b>IAS</b>      | meanSD      | 0.277702 | 0.077118 | 20 | 1.292767 | 0.210827 | 0.332213 |
| <b>IAS</b>      | d1delta     | -0.32499 | 0.105619 | 15 | -1.33093 | 0.203089 | 0.332213 |
| <b>IAS</b>      | maxTA_d1    | -0.32274 | 0.10416  | 15 | -1.32063 | 0.20642  | 0.332213 |
| <b>thickum</b>  | maxTA_d1    | 0.320499 | 0.10272  | 15 | 1.310414 | 0.209767 | 0.332213 |
| <b>thickum</b>  | AUC_W       | -0.23454 | 0.055009 | 25 | -1.20635 | 0.238974 | 0.36549  |
| <b>IAS</b>      | meancell    | -0.17647 | 0.031141 | 35 | -1.06064 | 0.296118 | 0.430315 |
| <b>meanSD</b>   | d1delta     | -0.29968 | 0.089807 | 12 | -1.08813 | 0.29791  | 0.430315 |
| <b>meancell</b> | d7delta     | -0.24936 | 0.062178 | 15 | -0.99725 | 0.33446  | 0.470052 |
| <b>meancell</b> | d1delta     | 0.238071 | 0.056678 | 15 | 0.949342 | 0.357493 | 0.476657 |
| <b>meanSD</b>   | AUC_D       | 0.25024  | 0.06262  | 14 | 0.967081 | 0.349914 | 0.476657 |
| <b>thickum</b>  | d1delta     | 0.230808 | 0.053272 | 15 | 0.918722 | 0.372779 | 0.484612 |
| <b>IAS</b>      | d7delta     | -0.20197 | 0.04079  | 15 | -0.79867 | 0.436947 | 0.554176 |
| <b>meanSD</b>   | AUC_D_night | -0.20233 | 0.040936 | 13 | -0.7449  | 0.469583 | 0.581388 |
| <b>thickum</b>  | d7delta     | 0.179804 | 0.032329 | 15 | 0.707914 | 0.489853 | 0.592381 |
| <b>meanSD</b>   | d7delta     | -0.19194 | 0.03684  | 12 | -0.67749 | 0.510945 | 0.603844 |
| <b>AUC_W</b>    | d7delta     | 0.122804 | 0.015081 | 24 | 0.606201 | 0.550073 | 0.63564  |
| <b>thickum</b>  | AUC_D       | 0.061369 | 0.003766 | 24 | 0.301215 | 0.765845 | 0.865738 |
| <b>AUC_W</b>    | meanSD      | -0.05449 | 0.00297  | 23 | -0.26173 | 0.795859 | 0.880525 |
| <b>meancell</b> | AUC_D       | -0.04414 | 0.001948 | 24 | -0.21643 | 0.830482 | 0.881108 |
| <b>meanSD</b>   | maxTA_d1    | -0.05674 | 0.00322  | 12 | -0.19688 | 0.847219 | 0.881108 |
| <b>AUC_W</b>    | maxTA_d1    | 0.047827 | 0.002287 | 24 | 0.234572 | 0.816531 | 0.881108 |
| <b>AUC_W</b>    | d1delta     | -0.01979 | 0.000392 | 24 | -0.09699 | 0.923543 | 0.941652 |
| <b>meancell</b> | maxTA_d1    | -0.0161  | 0.000259 | 15 | -0.06237 | 0.951094 | 0.951094 |

#### Abbreviations:

|             |                                                               |
|-------------|---------------------------------------------------------------|
| AUC_W       | Area under the curve, LiCor data well-watered                 |
| AUC_D       | Area under the curve, LiCor data drought-stressed             |
| AUC_W_night | Area under the curve, LiCor data well-watered, night only     |
| AUC_D_night | Area under the curve, LiCor data drought-stressed, night only |
| meancell    | Mean cell area (um)                                           |
| thickum     | Mean leaf thickness (um)                                      |
| IAS         | Intercellular airspace                                        |
| d1delta     | Leaf acid accumulation, well-watered                          |
| d7delta     | Leaf acid accumulation, drought-stressed                      |
| maxTA_d1    | Maximum amount of acid accumulated (well-watered)             |
| meanSD      | Mean stomatal density                                         |
