# Supplementary material
Source: PubMed Central journal article supplement (PMC7988526)
Supplement: mcaa036_suppl_supplementary_table_s06.pdf [file mcaa036_suppl_supplementary_table_s06.pdf]

**Supplementary Table 6** – Correlations of traits in *Y. gloriosa*, on both raw data (individual plants) and genotypic means.

| Correlations on raw data |             |          |          |    |          |          |          |
|--------------------------|-------------|----------|----------|----|----------|----------|----------|
| x                        | y           | cor      | R2       | df | t.value  | p.value  | padj     |
| maxTA_d1                 | d7delta     | 0.516884 | 0.26717  | 82 | 5.467624 | 4.81E-07 | 2.50E-05 |
| AUC_D                    | AUC_W       | 0.490753 | 0.240839 | 81 | 5.069189 | 2.48E-06 | 6.44E-05 |
| meancell                 | thickum     | 0.575391 | 0.331075 | 46 | 4.771478 | 1.88E-05 | 0.000327 |
| AUC_D_night              | AUC_W       | 0.339206 | 0.115061 | 81 | 3.245257 | 0.001707 | 0.022189 |
| thickum                  | AUC_W       | -0.47815 | 0.228629 | 32 | -3.0797  | 0.004234 | 0.04403  |
| IAS                      | AUC_W       | -0.45938 | 0.211029 | 31 | -2.87953 | 0.007159 | 0.062046 |
| AUC_D_night              | AUC_W_night | 0.236805 | 0.056077 | 81 | 2.193641 | 0.031128 | 0.210213 |
| IAS                      | meancell    | 0.308513 | 0.09518  | 45 | 2.175701 | 0.034869 | 0.210213 |
| meancell                 | AUC_W       | -0.36021 | 0.12975  | 32 | -2.18427 | 0.036383 | 0.210213 |
| IAS                      | thickum     | 0.271374 | 0.073644 | 45 | 1.891408 | 0.065017 | 0.338088 |
| AUC_W                    | d1delta     | -0.20811 | 0.043311 | 65 | -1.71541 | 0.091034 | 0.364136 |
| AUC_D_night              | d7delta     | 0.213381 | 0.045531 | 64 | 1.747289 | 0.085384 | 0.364136 |
| AUC_D_night              | maxTA_d1    | 0.213933 | 0.045767 | 66 | 1.779194 | 0.079812 | 0.364136 |
| d7delta                  | AUC_D       | 0.185864 | 0.034545 | 63 | 1.501413 | 0.138245 | 0.467505 |
| IAS                      | AUC_D       | -0.29473 | 0.086865 | 24 | -1.51099 | 0.143848 | 0.467505 |
| IAS                      | maxTA_d1    | 0.31441  | 0.098853 | 22 | 1.553493 | 0.134574 | 0.467505 |
| AUC_W_night              | thickum     | -0.18654 | 0.034797 | 32 | -1.07407 | 0.290823 | 0.639356 |
| AUC_W_night              | AUC_D       | -0.11541 | 0.01332  | 81 | -1.0457  | 0.298809 | 0.639356 |
| IAS                      | AUC_W_night | -0.20386 | 0.04156  | 31 | -1.15941 | 0.255144 | 0.639356 |
| IAS                      | AUC_D_night | -0.21104 | 0.044536 | 25 | -1.07949 | 0.290675 | 0.639356 |
| meancell                 | d7delta     | -0.26111 | 0.068181 | 21 | -1.23958 | 0.228805 | 0.639356 |
| meanSD                   | AUC_D       | 0.293667 | 0.08624  | 14 | 1.149486 | 0.269615 | 0.639356 |
| meanSD                   | AUC_W_night | -0.23628 | 0.05583  | 18 | -1.03168 | 0.315888 | 0.639356 |
| AUC_D                    | d1delta     | -0.14195 | 0.020151 | 63 | -1.13826 | 0.259323 | 0.639356 |
| AUC_W_night              | d1delta     | -0.12343 | 0.015235 | 65 | -1.0028  | 0.319678 | 0.639356 |
| AUC_D_night              | d1delta     | 0.140285 | 0.01968  | 64 | 1.133487 | 0.261238 | 0.639356 |
| meanSD                   | d1delta     | -0.23486 | 0.055161 | 16 | -0.96649 | 0.348183 | 0.670574 |
| meancell                 | d1delta     | 0.19442  | 0.037799 | 22 | 0.929649 | 0.362642 | 0.673478 |
| meancell                 | meanSD      | -0.24757 | 0.061289 | 12 | -0.88514 | 0.39347  | 0.690383 |
| d1delta                  | d7delta     | 0.093933 | 0.008823 | 81 | 0.849155 | 0.398298 | 0.690383 |
| IAS                      | d7delta     | 0.169986 | 0.028895 | 21 | 0.79048  | 0.438084 | 0.721418 |
| AUC_W                    | maxTA_d1    | -0.09367 | 0.008774 | 67 | -0.7701  | 0.44395  | 0.721418 |
| thickum                  | AUC_D       | -0.13593 | 0.018477 | 25 | -0.68602 | 0.499015 | 0.768127 |
| meancell                 | AUC_D       | -0.13492 | 0.018204 | 25 | -0.68083 | 0.502237 | 0.768127 |
| AUC_D_night              | thickum     | -0.11751 | 0.013808 | 26 | -0.60335 | 0.551501 | 0.801692 |
| thickum                  | meanSD      | 0.172658 | 0.029811 | 12 | 0.607225 | 0.555018 | 0.801692 |
| meanSD                   | AUC_D_night | 0.156352 | 0.024446 | 13 | 0.570753 | 0.5779   | 0.812184 |
| AUC_W_night              | meancell    | -0.08123 | 0.006599 | 32 | -0.46105 | 0.647882 | 0.826928 |

|             |          |          |          |    |          |          |          |
|-------------|----------|----------|----------|----|----------|----------|----------|
| IAS         | meanSD   | 0.128288 | 0.016458 | 12 | 0.448107 | 0.662059 | 0.826928 |
| IAS         | d1delta  | 0.087654 | 0.007683 | 22 | 0.41272  | 0.683806 | 0.826928 |
| thickum     | d7delta  | -0.11332 | 0.01284  | 21 | -0.52264 | 0.606694 | 0.826928 |
| meanSD      | maxTA_d1 | 0.111805 | 0.0125   | 16 | 0.450043 | 0.658717 | 0.826928 |
| AUC_D       | maxTA_d1 | 0.051312 | 0.002633 | 65 | 0.414238 | 0.680063 | 0.826928 |
| thickum     | maxTA_d1 | 0.073442 | 0.005394 | 22 | 0.345405 | 0.733071 | 0.828688 |
| meancell    | maxTA_d1 | -0.07895 | 0.006233 | 22 | -0.37147 | 0.713839 | 0.828688 |
| AUC_W_night | d7delta  | -0.04302 | 0.001851 | 65 | -0.3472  | 0.729565 | 0.828688 |
| AUC_D_night | meancell | 0.048035 | 0.002307 | 26 | 0.245212 | 0.808217 | 0.875569 |
| thickum     | d1delta  | 0.0559   | 0.003125 | 22 | 0.262606 | 0.795298 | 0.875569 |
| AUC_W       | meanSD   | -0.04439 | 0.00197  | 18 | -0.18852 | 0.852581 | 0.900431 |
| meanSD      | d7delta  | 0.037321 | 0.001393 | 16 | 0.149387 | 0.883115 | 0.900431 |
| AUC_W_night | maxTA_d1 | 0.01897  | 0.00036  | 67 | 0.155306 | 0.877047 | 0.900431 |
| AUC_W       | d7delta  | 0.01251  | 0.000156 | 65 | 0.100863 | 0.91997  | 0.91997  |

### Correlations on genotypic means

| x           | y           | cor      | R2       | df | t.value  | p.value  | padj     |
|-------------|-------------|----------|----------|----|----------|----------|----------|
| meancell    | thickum     | 0.682529 | 0.465846 | 24 | 4.575026 | 0.000122 | 0.00443  |
| AUC_D       | AUC_W       | 0.717565 | 0.5149   | 20 | 4.607452 | 0.00017  | 0.00443  |
| maxTA_d1    | d7delta     | 0.579777 | 0.336141 | 22 | 3.337599 | 0.002983 | 0.051712 |
| IAS         | meancell    | 0.499083 | 0.249084 | 24 | 2.821519 | 0.009444 | 0.070159 |
| IAS         | AUC_W       | -0.59105 | 0.349339 | 17 | -3.02114 | 0.0077   | 0.070159 |
| thickum     | AUC_W       | -0.58295 | 0.339826 | 17 | -2.95817 | 0.008805 | 0.070159 |
| meancell    | AUC_W       | -0.58217 | 0.338924 | 17 | -2.95223 | 0.008917 | 0.070159 |
| AUC_W_night | thickum     | -0.49997 | 0.249969 | 17 | -2.38028 | 0.02927  | 0.169113 |
| AUC_W       | d1delta     | -0.48973 | 0.239836 | 18 | -2.38308 | 0.028395 | 0.169113 |
| IAS         | thickum     | 0.401037 | 0.16083  | 24 | 2.144692 | 0.04231  | 0.220012 |
| AUC_W       | maxTA_d1    | -0.41711 | 0.17398  | 18 | -1.94711 | 0.067296 | 0.318128 |
| AUC_W_night | AUC_D       | -0.37138 | 0.137925 | 20 | -1.78881 | 0.088804 | 0.333418 |
| IAS         | AUC_D       | -0.39844 | 0.158752 | 17 | -1.79111 | 0.091097 | 0.333418 |
| IAS         | AUC_D_night | -0.41138 | 0.169232 | 17 | -1.86091 | 0.080142 | 0.333418 |
| meanSD      | AUC_D       | 0.480917 | 0.231281 | 11 | 1.81921  | 0.096178 | 0.333418 |
| IAS         | maxTA_d1    | 0.408033 | 0.166491 | 13 | 1.61143  | 0.131088 | 0.426036 |
| AUC_D_night | AUC_W       | 0.317606 | 0.100873 | 20 | 1.497934 | 0.149768 | 0.458114 |
| AUC_W_night | d1delta     | -0.32345 | 0.104623 | 18 | -1.45026 | 0.164188 | 0.47432  |
| meancell    | AUC_D       | -0.32166 | 0.103466 | 17 | -1.40068 | 0.179297 | 0.490708 |
| thickum     | AUC_D       | -0.30447 | 0.092699 | 17 | -1.31791 | 0.205017 | 0.533044 |
| AUC_D_night | thickum     | -0.28913 | 0.083594 | 17 | -1.24529 | 0.229919 | 0.543444 |
| AUC_W       | d7delta     | -0.28639 | 0.082017 | 18 | -1.26815 | 0.220902 | 0.543444 |
| IAS         | AUC_W_night | -0.27801 | 0.077292 | 17 | -1.19332 | 0.249131 | 0.563252 |
| IAS         | d7delta     | 0.305763 | 0.093491 | 13 | 1.157898 | 0.267737 | 0.580096 |
| meancell    | d1delta     | 0.279184 | 0.077944 | 13 | 1.048297 | 0.313601 | 0.652291 |
| AUC_W_night | d7delta     | -0.22718 | 0.051613 | 18 | -0.98974 | 0.33542  | 0.67084  |
| meancell    | d7delta     | -0.25806 | 0.066594 | 13 | -0.96306 | 0.353088 | 0.673016 |

|             |             |          |          |    |          |          |          |
|-------------|-------------|----------|----------|----|----------|----------|----------|
| meanSD      | AUC_W_night | -0.23572 | 0.055566 | 15 | -0.93943 | 0.362393 | 0.673016 |
| AUC_W_night | meancell    | -0.2117  | 0.044817 | 17 | -0.8931  | 0.38427  | 0.689036 |
| d7delta     | AUC_D       | 0.176761 | 0.031245 | 18 | 0.761933 | 0.455969 | 0.728608 |
| AUC_D       | d1delta     | -0.19036 | 0.036236 | 18 | -0.82267 | 0.421463 | 0.728608 |
| AUC_D_night | d7delta     | 0.168961 | 0.028548 | 18 | 0.727298 | 0.476397 | 0.728608 |
| AUC_D_night | maxTA_d1    | 0.185096 | 0.034261 | 18 | 0.799105 | 0.434648 | 0.728608 |
| d1delta     | d7delta     | 0.15544  | 0.024162 | 22 | 0.738049 | 0.468285 | 0.728608 |
| thickum     | meanSD      | 0.19293  | 0.037222 | 10 | 0.62178  | 0.547999 | 0.749894 |
| meanSD      | AUC_D_night | 0.198386 | 0.039357 | 10 | 0.640074 | 0.536513 | 0.749894 |
| meanSD      | d1delta     | -0.20904 | 0.043699 | 10 | -0.67599 | 0.514376 | 0.749894 |
| AUC_D_night | d1delta     | 0.15032  | 0.022596 | 18 | 0.645085 | 0.52701  | 0.749894 |
| AUC_W_night | maxTA_d1    | -0.13475 | 0.018157 | 18 | -0.57694 | 0.571125 | 0.7615   |
| AUC_D_night | meancell    | -0.07564 | 0.005721 | 17 | -0.31275 | 0.758276 | 0.875571 |
| AUC_W       | meanSD      | 0.073861 | 0.005456 | 15 | 0.286848 | 0.778153 | 0.875571 |
| AUC_D_night | AUC_W_night | -0.08219 | 0.006755 | 20 | -0.36882 | 0.716141 | 0.875571 |
| IAS         | meanSD      | -0.093   | 0.008649 | 10 | -0.29536 | 0.773757 | 0.875571 |
| IAS         | d1delta     | 0.071059 | 0.005049 | 13 | 0.256855 | 0.801311 | 0.875571 |
| thickum     | d1delta     | 0.068544 | 0.004698 | 13 | 0.247722 | 0.808219 | 0.875571 |
| thickum     | maxTA_d1    | 0.094089 | 0.008853 | 13 | 0.340754 | 0.738732 | 0.875571 |
| meancell    | meanSD      | -0.13453 | 0.018097 | 10 | -0.42931 | 0.676801 | 0.875571 |
| meanSD      | maxTA_d1    | 0.081716 | 0.006677 | 10 | 0.259275 | 0.800682 | 0.875571 |
| meanSD      | d7delta     | -0.05725 | 0.003277 | 10 | -0.18133 | 0.859734 | 0.912371 |
| AUC_D       | maxTA_d1    | -0.03399 | 0.001155 | 18 | -0.14427 | 0.886888 | 0.922363 |
| meancell    | maxTA_d1    | 0.023962 | 0.000574 | 13 | 0.08642  | 0.932449 | 0.950732 |
| thickum     | d7delta     | -0.00293 | 8.61E-06 | 13 | -0.01058 | 0.991721 | 0.991721 |

### Abbreviations:

|             |                                                               |
|-------------|---------------------------------------------------------------|
| AUC_W       | Area under the curve, LiCor data well-watered                 |
| AUC_D       | Area under the curve, LiCor data drought-stressed             |
| AUC_W_night | Area under the curve, LiCor data well-watered, night only     |
| AUC_D_night | Area under the curve, LiCor data drought-stressed, night only |
| meancell    | Mean cell area (um)                                           |
| thickum     | Mean leaf thickness (um)                                      |
| IAS         | Intercellular airspace                                        |
| d1delta     | Leaf acid accumulation, well-watered                          |
| d7delta     | Leaf acid accumulation, drought-stressed                      |
| maxTA_d1    | Maximum amount of acid accumulated (well-watered)             |
| meanSD      | Mean stomatal density                                         |
